# Supplementary material for: A Diagnostic Gene Expression Signature for Bladder Cancer Can Stratify Cases into Prescribed Molecular Subtypes and Predict Outcome
Source: MDPI journal article supplement (doi:10.3390/diagnostics12081801), 2022-07-25
Supplement: s1 [file s1]

**Supplemental Table S1** Top biological processes and cellular component reported in the gene ontology pathway analysis of differentially expressed genes associated with a bladder cancer associated signature

|            | <b>Biological Process (Gene Ontology)</b>    |                  |          |                      |
|------------|----------------------------------------------|------------------|----------|----------------------|
| GO-term    | Description                                  | Count in network | Strength | False discovery rate |
| GO:0050930 | Induction of positive chemotaxis             | 2 of 15          | 2.42     | 0.0301               |
| GO:0043117 | Positive regulation of vascular permeability | 2 of 16          | 2.39     | 0.0304               |
| GO:0043116 | Negative regulation of vascular permeability | 2 of 18          | 2.34     | 0.0304               |
| GO:0030225 | Macrophage differentiation                   | 2 of 26          | 2.18     | 0.0385               |
| GO:0002690 | Positive regulation of leukocyte chemotaxis  | 3 of 98          | 1.78     | 0.0210               |
|            | <b>Cellular Component (Gene Ontology)</b>    |                  |          |                      |
| GO-term    | Description                                  | Count in network | Strength | False discovery rate |
| GO:0005615 | Extracellular space                          | 9 of 3195        | 0.74     | 0.00087              |
