# Supplementary material for: A Diagnostic Gene Expression Signature for Bladder Cancer Can Stratify Cases into Prescribed Molecular Subtypes and Predict Outcome
Source: MDPI journal article supplement (doi:10.3390/diagnostics12081801), 2022-07-25
Supplement: s1 [file s1]

# Oncuria™

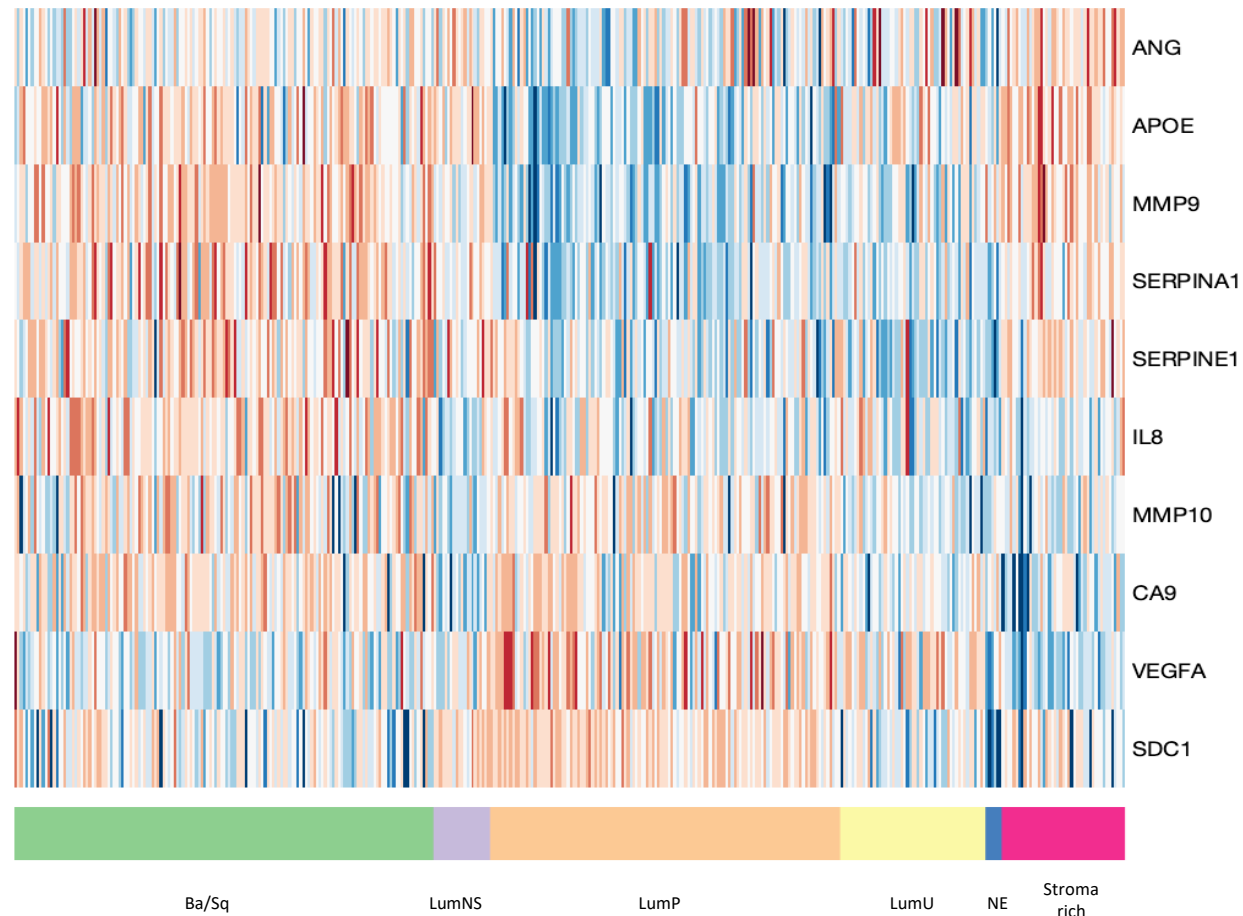

**Supplemental Figure S1.** Heatmap illustrating application of the 10 biomarkers of Oncuria™ associated with the 6 consensus molecular subtype in the TCGA cohort. Blue to Brown shows a trend from low to high gene expression.
