# Supplementary material for: A Diagnostic Gene Expression Signature for Bladder Cancer Can Stratify Cases into Prescribed Molecular Subtypes and Predict Outcome
Source: MDPI journal article supplement (doi:10.3390/diagnostics12081801), 2022-07-25

**Supplemental Figure S2.** Kaplan–Meier survival curves for each of the 10 biomarkers associated with Oncuria™ in A) GSE87304, B) GSE48075 and C) GSE32894.

**A) GSE87304**

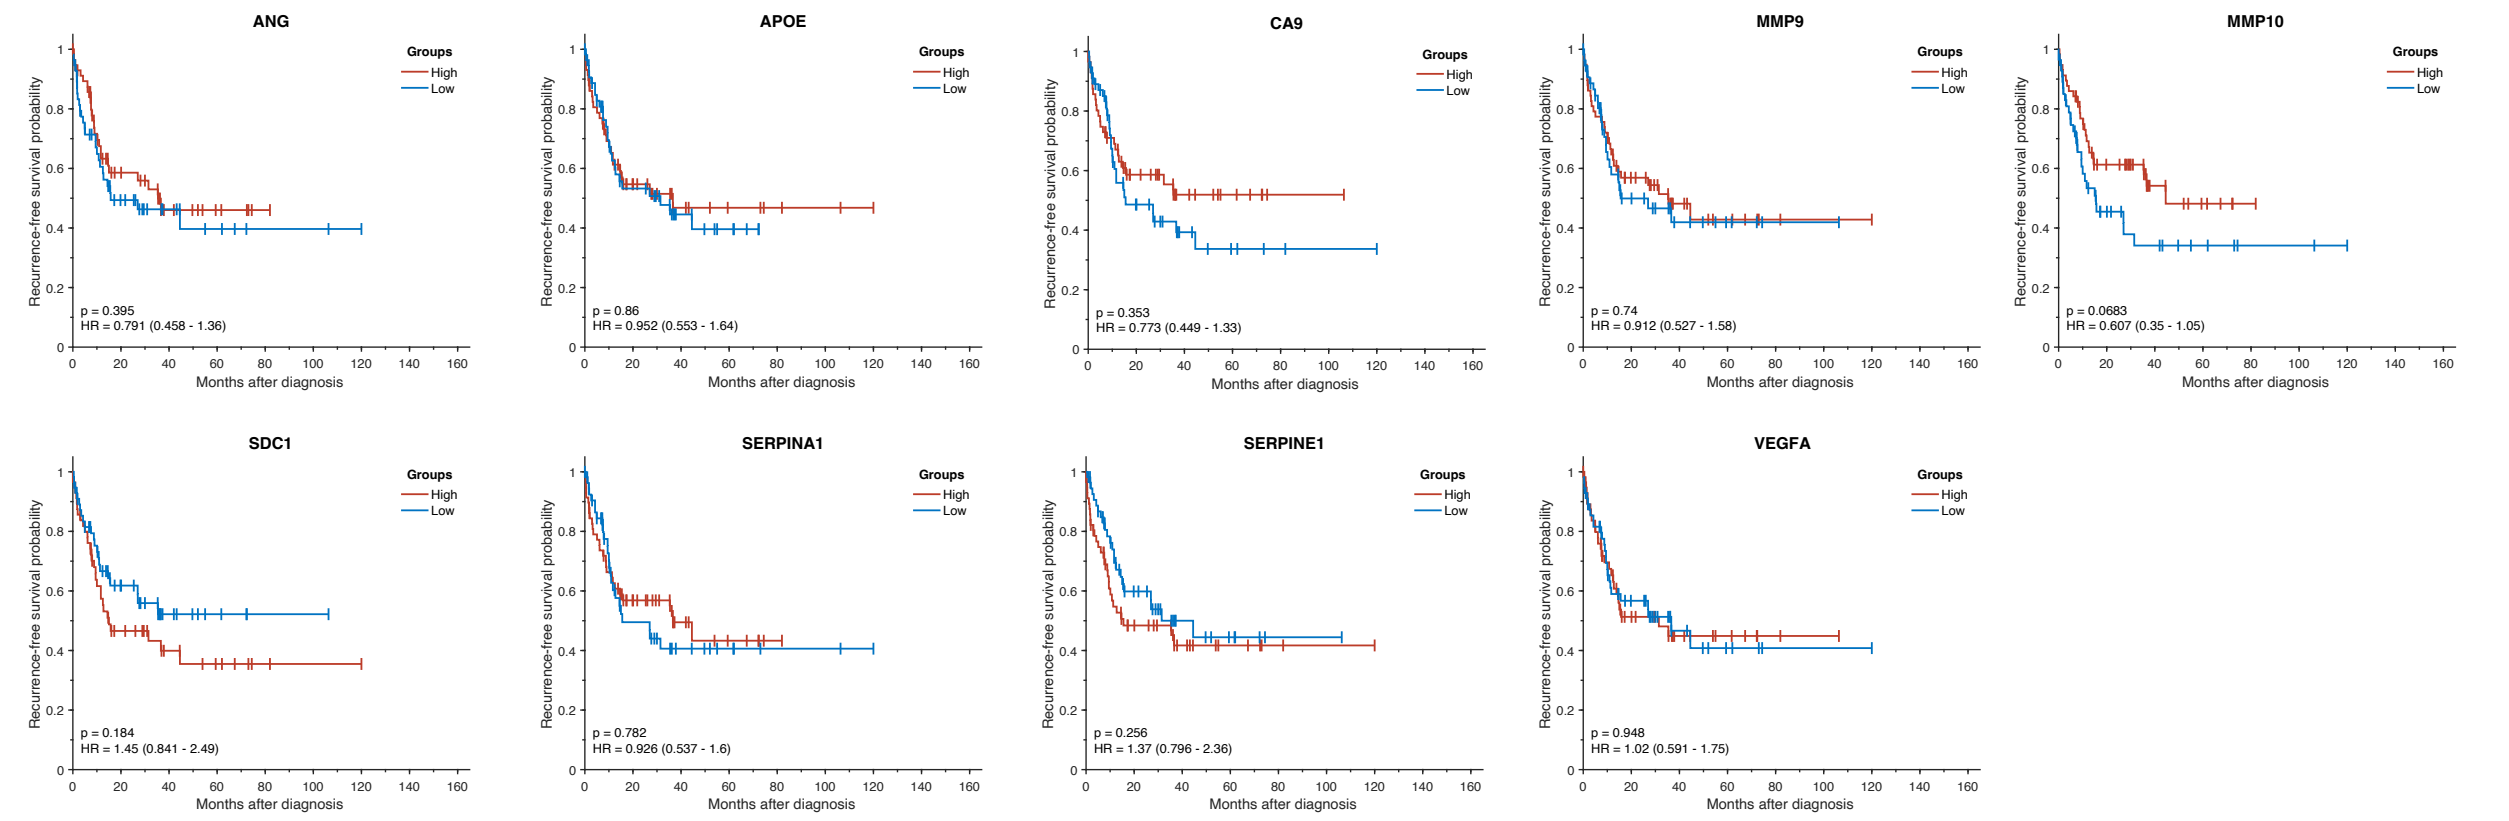

B) GSE48075

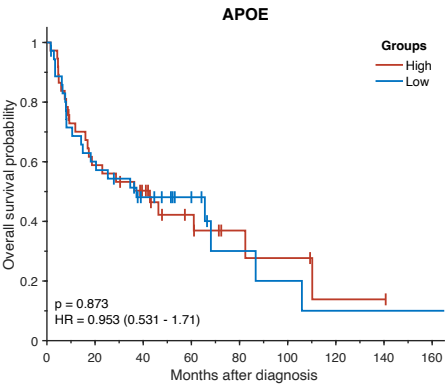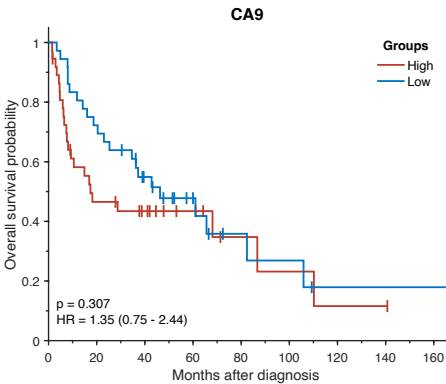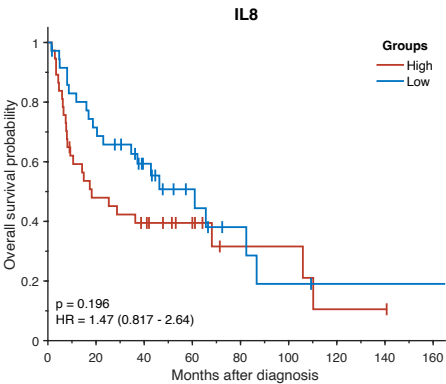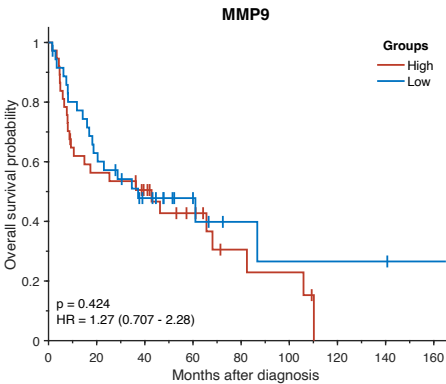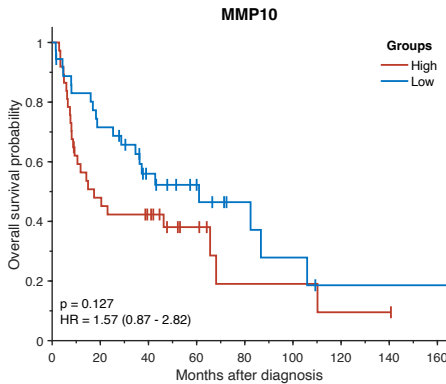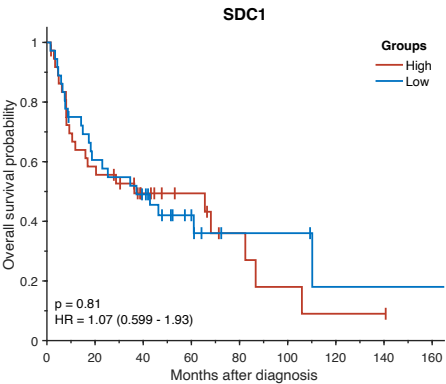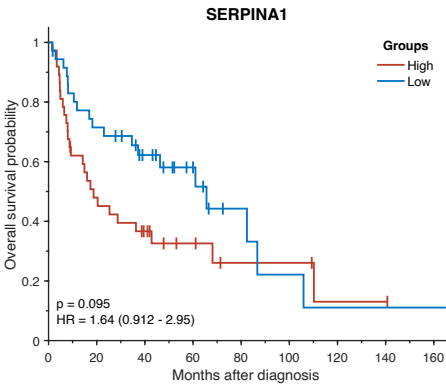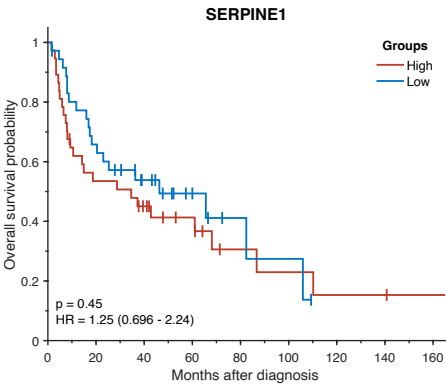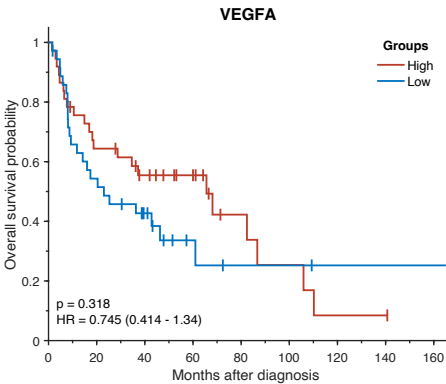

# C) GSE32894

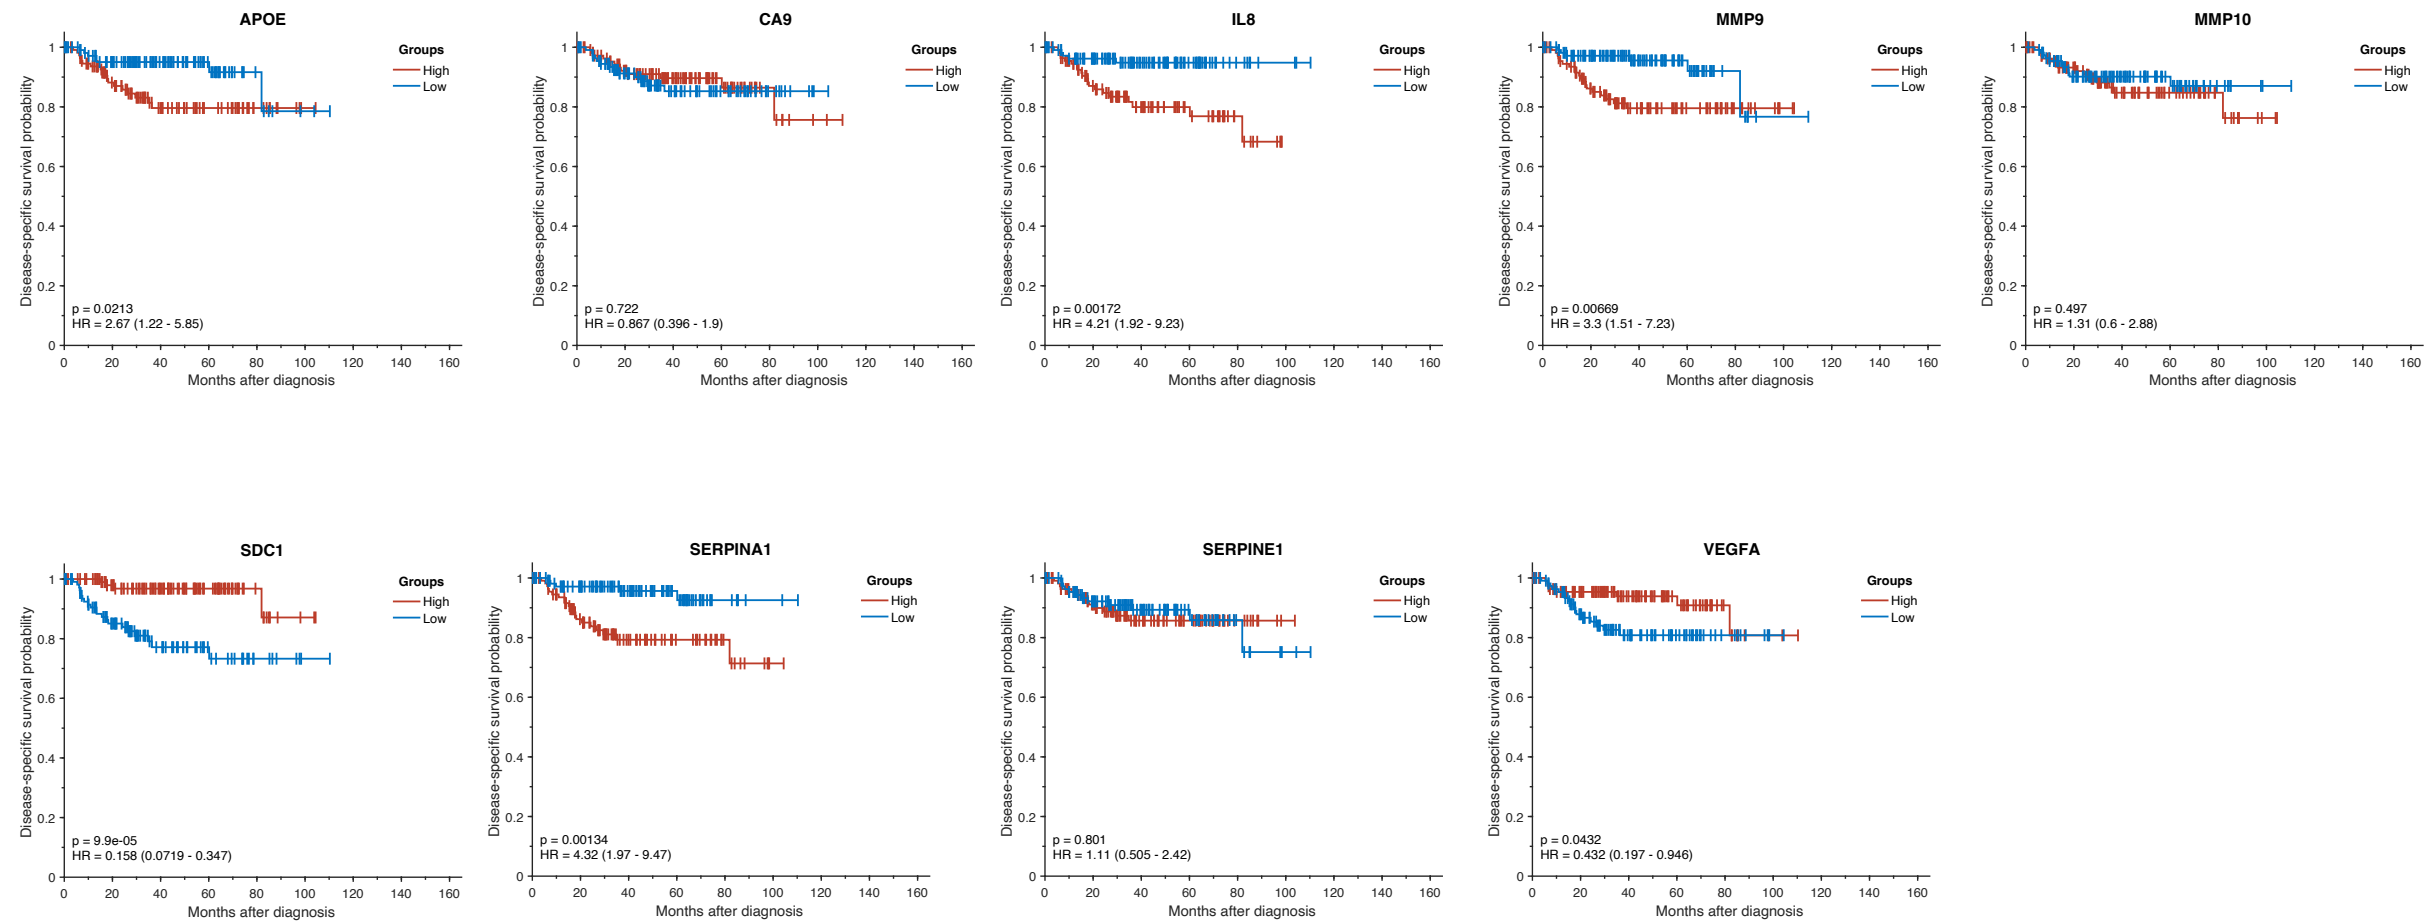

Supplement: s1 [file s1]
